# Supplementary material for: Synthesis and electrogenerated chemiluminescence of donor-substituted phenylquinolinylethynes and phenylisoquinolinylethynes: effect of positional isomerismElectronic supplementary information (ESI) available: synthetic procedures, measurement details and characterization data of all compounds. See http://www.rsc.org/suppdata/ob/b4/b403775h/
Source: Royal Society of Chemistry journal article supplement (doi:10.1039/b403775h), 2004-01-01
Supplement: b403775h.doc [file b403775h.doc]

**Synthesis and electrogenerated chemiluminescence of donor-substituted phenylquinolinylethynes and phenylisoquinolinylethynes: Effect of positional isomerism**

**Arumugasamy Elangovan, Shu-Wen Yang, Jui-Hsien Lin, Kuo-Ming Kaoand Tong-Ing Ho***

*Department of Chemistry, National Taiwan University, Taipei 106, Taiwan R.O.C*

**Electronic Supplementary Information**

**Materials:**

All the chemicals and reagents were purchased from Acros Organics unless otherwise indicated and used as received. Dicholobis(triphenylphosphine)palladium(II) was either prepared in-house or from commercial source (Acros). Solvents were distilled as per the standard methods and purged with nitrogen before use. Triethylamine (TEA) and tetrahydrofuran (THF) were distilled and purged with a mixture of approximately 1:1 nitrogen and hydrogen before use.

**Methods:**

**Instrumentation:**

1H – NMR spectra of the samples were recorded with 400 MHz Varian instrument and 13C – NMR spectra were recorded with the same instrument at 100.1 MHz operator frequency in CDCl3 solvent (Merck) with CHCl3 internal standard (= 7.24 ppm for 1H and 77 ppm, middle of the three peaks, for 13C spectra), unless otherwise specified. Mass spectra were recorded with Jeol SX 102A instrument on nitrobenzylalcohol matrix. TLC was run on Merck precoated aluminium plates (Si 60 F245). Column chromatography was run on Merck silica gel (60 -120 mesh) and neutral alumina (Merck) 70 – 230 mesh.

______________________

*Correspondence: Prof. Tong-Ing Ho, fax: +886-2-2363-6359. E-mail: hall@ ntu.edu.tw

**UV Visible spectra:**

All UV-Visible speactra were recorded on HITACHI U-2000 spectrophotometer with 10 m solution of the compounds in CH3CN and all fluorescence spectra on HITACHI F-3010flourescence spectrophotometer with 0.5 nm slit width using similar solution concentrations.

**Cyclic Voltammetry (CV):**

CV measurements for series **1a-1f** were done on Voltammograph CV-27 with X-Y recorder using carbon disc (2.0 mm) working electrode and a platinum wire counter electrode together with a Ag/AgCl reference electrode with a scan rate of 100 mV/s. CV measurements for the rest were done on CH Instruments Electrochemical Analyzer with the aid of a PC using CHI 405 Time Resolved Electrochemical Quartz Crystal Microbalance program. The cell used is three-electrode cell consisting of carbon disc (2.0 mm) working electrode, a platinum wire counter electrode and a Ag/AgCl reference electrode. The scan rates were 50 and 100 mV/s.

**Electrogenerated Chemiluminescence (ECL) Measurements:**

ECL spectra were recorded using a setup consisting of F-3010 Flourescence spectrophotometer, CV-27 voltammograph with a PC interface. Typically 1 mmol concentration of the compound solution in acetonitrile with 0.05 M tetrabutylammonium hexaflourophosphate (TBAP) were used. To generate reaction, the platinum electrode was pulsed between first reduction and oxidation potentials and the pulse interval was controlled on a PC by software designed by C. –Y. Chen. The relative intensities of fluorescence as well as ECL were measured relative to ruthenium-2,2’-bipyridine complex.

**Synthetic procedures**

**I. General procedure for the synthesis of terminal alkynes**

A 50 mL round bottom flask was charged with the halide (1 m mol), dichlorobis(triphenylphosphine)palladium(II), the catalyst, (1 mol %) and CuI (1 mol %) along with a magnetic stirring bar and degassed and back-filled three times with a mixture of approximately 10 - 40 % hydrogen and nitrogen/argon filled in a balloon. TEA (8 mL) was introduced into the reaction flask using a syringe under the gaseous mixture atmosphere. Then trimethylsilylacetylene (TMSA) (1.1 m mol) was added to the reaction flask using a syringe with stirring. After required time of stirring, the solvent was evaporated and the residue was shaken with 10 ml saturated aqueous sodium bicarbonate solution and ether/hexane (10 ml). The organic layer was washed with water and then dried over anhydrous sodium sulfate. Evaporation of solvent left a brown residue which was chromatographed on a short neutral alumina column using hexane eluant to get the trimethylsilyl derivative.

**Hydrolysis** (de-protection of trimethylsilyl group):

The trimethylsilyl compound was dissolved in methanol (8-10 mL) and stirred with > 2 equivalent of K2CO3 (unless otherwise specified) for 2 hours exclusion of air and then the solvent was evaporated to half its original volume, shaken with water (15 - 20mL) and the product was extracted with ether (20 mL + 2x10 mL). The combined ether solutions were washed with brine, died over anhydrous sodium sulfate and then passed through a short alumina column. Evaporation of the solvent afforded analytically pure terminal alkyne.

**II. General procedure for the synthesis of internal alkynes**

2-Chloroquinoline (1 m mol), the palladium catalyst (2 mol %), CuI (1 mol %) and a stirring bar were placed in a two neck round bottom flask fitted with a condenser. The whole set up was degassed and back-filled with gaseous mixture as before. To the reaction flask was added previously degassed TEA (4 eq.) using a syringe. The terminal acetylene was dissolved in 8 mL THF and added to the reaction mixture at about 80 oC. The reaction was stirred at reflux for 24 hrs under the atmosphere of the gas mixture. The solvents were evaporated; saturated aqueous sodium bicarbonate solution (10 mL) was added to it at room temperature and extracted with ether (20 mL + 2x10 mL). The combined organic layers were washed with water followed by brine before drying and evaporating. The residue after evaporation was chromatographed on silica gel using ethyl acetate – hexane mixture (1:9 – 1:7 – 1:4) to separate the by-product, the butadiyne and the cross-coupled product.

Structures, synthesis yields, physical data and spectral characteristics are furnished below:


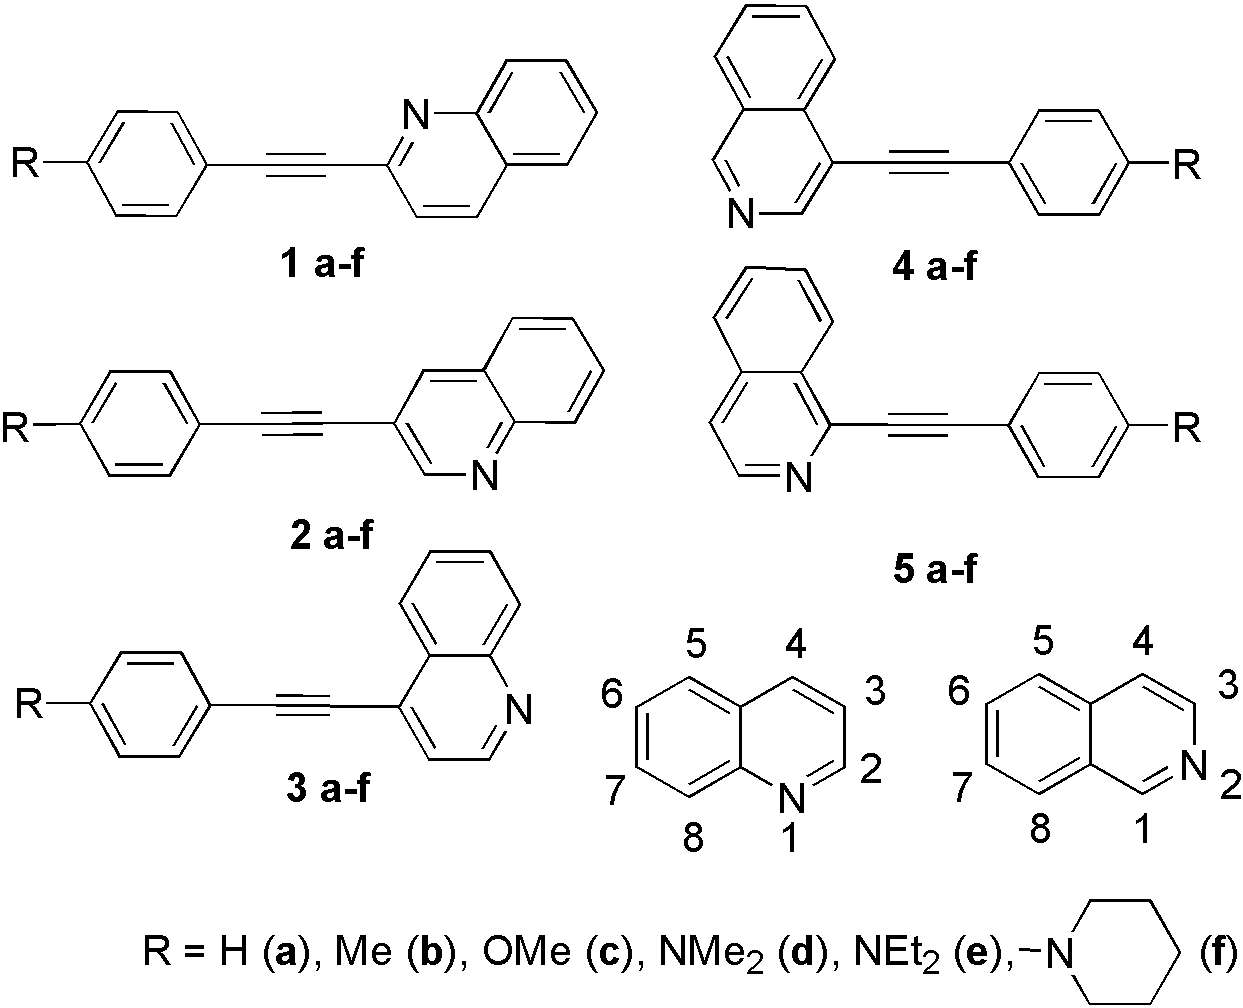


(Note: While 1H-NMR and mass spectra are consistent with the structures, some signals in the 13C-NMR of a few compounds could not be resolved adequately even after 2000 scans in 400 MHz)

Compound **1a:**

Yield: 96 % (Conversion 70 %) viscous liquid; 1H NMR (400 MHz CDCl3) /**, ppm:

7.35 (m, 3H), 7.52 (t, *J* 6.8 Hz, 1H), 7.58 (d, *J* 8.4 Hz, 1H), 7.64 (m, 2H), 7.70 (t, *J* 6.8 Hz, 1H), 7.76 (d, *J* 8.0 Hz, 1H), 8.11 (2d, 2H);

13C NMR (100 MHz CDCl3)**/**, ppm: 89.23, 89.88, 121.95, 124.20, 126.93, 127.33, 128.23, 129.0, 129.1, 129.89, 132.05, 135.97, 143.38, 147.96

MS (M+) 229.07 (calculated for C17H11N: 229.09); M++1: 230.09

Compound **1b:**

Yield: 94 % (Conversion: 73 %) liquid;

1H NMR (400 MHz CDCl3) /**, ppm: 2.37 (s, 3H), 7.17 (d, *J* 8.0 Hz, 2H), 7.54 (m, 4H), 7.71 (m, 1H), 7.78 (d, *J* 8.8 Hz, 1H), 8.11 (d, *J* 8.4 Hz, 2H)

13C NMR (100 MHz CDCl3)**/**, ppm: 21.74, 88.78, 90.28, 118.9, 124.22, 126.86, 126.9, 127.35, 129.05, 129.13, 129.87, 136.01, 135.94, 139.33, 143.61, 148.01

MS (M+): 243.15 (calculated for C18H13N: 243.10).

Compound **1c:**

Yield: 95 % (Conversion: 70 %) m.p: 115-116 ºC.

1H NMR (400 MHz CDCl3) /**, ppm: 3.81 (s, 3H), 6.88 (d *J* 8.8 Hz, 2H), 7.51 (t, *J* 7.2 Hz, 1H), 7.57 (m, 3H), 7.70 (t, *J* 7.2 Hz, 1H), 7.77 (d, *J* 8.0 Hz, 1H), 8.10 (m, 2H)

13C NMR (100 MHz CDCl3)**/**, ppm: 55.4, 88.3, 90.3, 114.0, 124.2, 126.7, 126.8, 127.3, 129.1, 129.8, 133.7, 135.9, 143.7, 148.0, 160.1

MS (M+): 259.10 (calculated for C18H13NO: 259.09).

Compound **1d:**

Yield: 99 % (Conversion: 76 %) m.p:126-128 ºC.

1H NMR (400 MHz CDCl3) /**, ppm: 3.00 (s, 6H), 6.65 (d, *J* 9.2 Hz, 2H), 7.48 (m, 1H), 7.54 (m, 4H), 7.69 (t, *J* 6.8 Hz, 1H), 7.75 (d, *J* 8.0 Hz, 1H), 8.08 (m, 2H)

13C NMR (100 MHz CDCl3)**/**, ppm: 40.5, 88.4, 92.6, 108.7, 111.9, 124.5, 126.8, 127.0, 127.6, 129.3, 130.0, 133.8, 136.0, 144.6, 148.4, 150.7

MS (M+): 272.09 (calculated for C19H16N2 272.13); M++1: 237.14

Compound **1e:**

Yield: 95 % (Conversion: 70 %) m.p: 112-115 ºC

1H NMR (400 MHz CDCl3) /**, ppm: 1.15 (t, *J* 7.6 Hz, 6H), 3.36 (q, *J* 7.2 Hz, 4H), 6.61 (d, *J* 8.8 Hz, 2H), 7.50 (m, 4H), 7.68 (t, *J* 7.6 Hz, 1H), 7.75 (d, *J* 8.0 Hz, 1H), 8.07 (m, 2H)

13C NMR (100 MHz CDCl3)**/**, ppm: 13.48, 30.49, 45.04, 88.39, 92.98, 107.59, 111.23, 124.42, 126.55, 126.81, 127.50, 129.15, 129.85, 133.89, 135.81, 144.54, 148.10

MS (M+): 300.10 (calculated for C21H20N2: 300.16)

Compound **1f:**

Yield: 80 % (Conversion: 75 %) m.p: 154-156 ºC

1H NMR (400 MHz CDCl3) /**, ppm: 1.54-1.65 (2m, 6H), 3.19 (t, 4H), 6.81 (d, *J* 8.8 Hz, 2H), 7.45 (m, 4H), 7.63 (t, *J* 8 Hz, 1H), 7.69 (d, *J* 8 Hz, 1H), 8.04 (d, *J* 8.4 Hz, 2H)

13C NMR (100 MHz CDCl3)**/**, ppm: 24.4, 25.6, 49.3, 88.2, 91.7, 110.6, 114.8, 124.2, 126.5, 126.7, 127.3, 129.0, 129.7, 133.3, 135.8, 144.2, 148.1, 151.8.

MS (M+): 312.09 (calculated for C22H20N2: 312.16)

Compound **2a:**

Yield: 85 % (Conversion: 79 %) m.p: 46-48 ºC

1H NMR (400 MHz CDCl3) /**, ppm: 9.00 (s, 1H), 8.29 (s, 1H), 8.10 (d, *J* 8Hz, 1H), 7.78 (d, *J* 8.4Hz, 1H), 7.71 (t, *J* 8Hz,1H), 7.59 (m, 2H), 7.55 (t, *J* 7.8Hz,1H), 7.38 (m,3H)

13C NMR (100 MHz CDCl3)**/**, ppm: 151.87, 146.58, 138.04, 131.56, 129.89, 129.21, 128.64, 128.30, 127.43, 127.12, 127.09, 122.43, 117.30, 92.55, 86.56

MS (M+): 229.08

Compound **2b:**

Yield: 92 % (Conversion: 75 %) m.p: 90-93 ºC

1H NMR (400 MHz CDCl3) /**, ppm: 8.99 (s, 1H), 8.29 (s, 1H), 8.10 (d, *J* 8.4Hz, 1H), 7.80 (d, *J* 8Hz, 1H), 7.72 (t, *J* 7.6Hz, 1H), 7.57 (t, *J* 7.6Hz, 1H), 7.49 (d, *J* 8Hz, 2H), 7.20 (d, *J* 8.4Hz, 2H), 2.39 (s, 3H)

13C NMR (100 MHz CDCl3)**/**, ppm: 152.08 , 150.23 , 146.23 , 137.14 , 132.79 , 130.38 , 129.41 , 129.18 , 127.34 , 126.99 , 118.33 , 111.71 , 209.03 , 94.17 , 84.78

MS (M+): 243.10

Compound **2c:**

Yield: 96 % (Conversion: 78 %) m.p: 83-85 ºC

1H NMR (400 MHz CDCl3) /**, ppm: 8.99 (s, 1H), 8.28 (s, 1H), 8.09 (d, *J* 8.4Hz, 1H), 7.79 (d, *J* 7.6Hz, 1H), 7.71 (t, *J* 7.6Hz, 1H), 7.56 (t, *J* 8.4Hz, 1H), 7.53 (d, *J* 8.8Hz, 2H), 6.91 (d, *J* 8.8Hz, 2H), 3.85 (s, 3H)

13C NMR (100 MHz CDCl3)**/**, ppm: 159.81, 151.96, 146.47, 137.69, 133.11, 129.73, 129.23, 127.41, 127.20, 127.10, 117.70, 114.53, 114.03, 92.70, 85.40

MS (M+): 259.09

Compound **2d:**

Yield: 96 % (Conversion: 77 %) m.p: 130-132 ºC

1H NMR (400 MHz CDCl3) /**, ppm: 8.98 (s, 1H), 8.24 (s, 1H), 8.08 (d, *J* 8.4Hz, 1H), 7.77 (d, *J* 8.4Hz, 1H), 7.68 (t, *J* 7.6Hz, 1H), 7.54 (t, *J* 7.6Hz, 1H), 7.46 (d, *J* 8.4Hz, 2H), 6.68 (d, *J* 8.4Hz, 2H), 3.01 (s, 6H)

13C NMR (100 MHz CDCl3)**/**, ppm: 151.97, 146.54, 138.91, 137.91, 131.49, 129.82, 129.23, 129.11, 127.44, 127.19, 127.12, 119.39, 117.58, 92.83, 85.97, 21.69

MS (M+): 272.13

Compound **2e:**

Yield: 95 % (Conversion: 77 %) m.p: 98-100 ºC

1H NMR (400 MHz CDCl3) /**, ppm: 8.97 (s, 1H), 8.23 (s, 1H), 8.08 (d, *J* 8.4Hz, 1H), 7.77 (d, *J* 8Hz, 1H), 7.68 (t, *J* 7.6Hz, 1H), 7.54 (t, *J* 7.6Hz, 1H), 7.43 (d, *J* 9.2Hz, 2H), 6.64 (d, *J* 8.8Hz, 2H), 3.39 (q, *J* 7.2Hz, 4H), 1.19 (t, *J* 6.6Hz, 6H)

13C NMR (100 MHz CDCl3)**/**, ppm: 152.10, 147.71, 146.16, 136.99, 133.01, 129.32, 129.16, 127.35, 127.31, 126.94, 118.45, 111.06, 107.87, 94.40, 84.54, 44.42, 12.69

MS (M+): 300.16

Compound **2f:**

Yield: 81 % (Conversion: 73 %) m.p: 160-162 ºC

1H NMR (400 MHz CDCl3) /**, ppm: 8.97 (s, 1H), 8.25 (s, 1H), 8.08 (d, *J* 8.4Hz, 1H), 7.78 (d, *J* 8Hz, 1H), 7.69 (t, *J* 8Hz, 1H), 7.55 (t, *J* 8Hz, 1H), 7.46 (d, *J* 8.8Hz, 2H), 6.88 (d, *J* 8.8Hz, 2H), 3.26 (q, *J* 4.8Hz,4H), 1.67 (m, 6H)

13C NMR (100 MHz CDCl3)**/**, ppm: 152.03, 151.59, 146.28, 137.30, 132.69, 129.50, 129.18, 127.35, 127.28, 127.00 , 118.12, 115.01, 111.22, 93.75, 84.97, 49.44, 25.62, 24.40

MS (M+): 312.16

Compound **3a:**

Yield: 88 % (Conversion: 65 %) liquid

1H NMR (400 MHz CDCl3) /**, ppm: 7.39~7.41 (m, 3H), 7.55 (d, *J* 4.0 Hz, 1H), 7.59-7.66 (m, 3H), 7.44 (t, *J* 8.3 Hz, 1H), 8.12 (d, *J* 8.3 Hz, 1H), 8.34 (d, *J* 8.0 Hz, 1H), 8.87 (s, broad, 1H)

13C NMR (100 MHz CDCl3)**/**, ppm: 85.02, 98.71, 122.17, 123.51(2C), 125.96, 127.19, 128.55 (2C), 129.33, 129.76, 129.91, 131.91, 147.98, 149.68

MS (M+): 229.07

Compound **3b**

Yield: 90% (Conversion: 70%) m.p: 87-89 ºC

1H NMR (400 MHz CDCl3) /**, ppm: 2.39 9s, 3H), 7.21(d, *J* 7.8 Hz, 2H), 7.53-7.55 (m, 3H), 7.59 (t, *J* 6.0 Hz, 1H), 7.71 (t, *J* 7.2 Hz, 1H), 8.11 (d, *J* 8.2 Hz, 1H), 8.35, (d, *J* 8.2 Hz, 1H), 8.87 ( s, broad, 1H)

13C NMR (100 MHz CDCl3)**/**, ppm: 21.62, 84.52, 99.09, 119.11, 123.39, 126.02, 127.10, 127.70, 129.32, 129.75, 129.86, 130.00, 131.84, 139.71, 148.00, 149.70

MS (M+): 243.09

Compound **3c:**

Yield: 86 % (Conversion: 68 %) viscous liquid;

1H NMR (400 MHz CDCl3) /**, ppm: 3.84 (s, 3H), 6.92 (d, J 8.8 Hz, 2H), 7.44 (d, J 8.2 Hz, 1H), 7.58, (d, J 8.8 Hz, 2H), 7.60 (t, J 7.0 Hz, 1H, 7.72, (t, J 7.0 Hz, 1H), 8.12 (d, J 8.2 Hz, 1H), 8.35, (d, J 8.2 Hz, 1H), 8.88 (s, broad, 1H)

13C NMR (100 MHz CDCl3)**/**, ppm: 55.37, 84.05, 99.23, 114.20, 126.05, 127.08, 128.43, 128.55, 129.71, 129.86, 130.26, 132.00, 132.11, 133.55, 160.46

MS(M+): 259.10

Compound **3d:**

Yield: 90 % (Conversion: 75 %) m.p: 130-132 ºC

1H NMR (400 MHz CDCl3) /**, ppm: 3.00 (s, 3H), 6.68 (d, J 8.9 Hz, 2H), 7.46-7.53 (m, 3H), 7.59 (t, 6.9 Hz, 1H), 7.72, (t, J 6.9 Hz, 1H), 8.10 (d, J 7.9 Hz, 1H), 8.38 (d, J 7.9 Hz, 1H), 8.85 (s, broad, 1H)

13C NMR (100 MHz CDCl3)**/**, ppm: 40.08, 83.74 (2C), 101.06, 108.52, 111.68, 126.22, 126.80, 129.66, 133.26, 150.69

MS(M+): 272.13

Compound **3e:**

Yield: 91 % (Conversion: 76 %) m.p: 134-136 ºC

1H NMR (400 MHz CDCl3) /**, ppm: 1.18 (t, J 7.0 Hz, 6H), 3.39, (q, J 7.0 Hz, 4H), 6.64 (d, J 8.9 Hz, 2H), 7.48-7.50 (m, 3H), 7.59 (t, 8.0 Hz, 1H), 7.73 (t, J 8.0 Hz, 1H), 8.10 (d, J 8.3 Hz 1H), 8.37 (d, J 8.2 Hz, 1H), 8.83 (s, broad, 1H)

13C NMR (100 MHz CDCl3)**/**, ppm: 12.55, 44.43, 83.64, 101.62, 107.47, 111.17, 122.71, 126.29, 126.83, 129.59, 129.75, 131.13, 133.61, 147.93, 148.33, 149.73

MS(M+): 300.16

Compound **3f:**

Yield: 86 % (Conversion: 70 %) m.p: 129-131 ºC

1H NMR (400 MHz CDCl3) /**, ppm: 1.60-1.70 (m, 6H), 3.26 (t, 5.6 Hz, 4H), 6.88 (d, J 8.8 Hz, 2H), 7.49-7.52 (m, 3H), 7.60 (t, J 7.4 Hz, 1H), 7.72 (t, J 7.3 Hz, 1H), 8.10 (d, J 8.4 Hz, 1H), 8.36 (d, J 8.2 Hz, 1H), 8.84 (s, broad, 1H)

13C NMR (100 MHz CDCl3)**/**, ppm: 24.31, 25.48, 49.25, 83.86, 100.67, 110.69, 114.97, 122.97, 126.22, 129.66, 129.81, 130.81, 130.75, 133.26, 147.98, 152.12

MS(M+): 312.16

Compound **4a:**

Yield: 90 % (Conversion: 72 %), m.p: 50-52 ºC

1H NMR (400 MHz CDCl3) /**, ppm: 9.19 (s, 1H), 8.76 (s, 1H), 8.33 (d, *J* 8.8Hz, 1H), 7.99 (d, *J* 8Hz, 1H), 7.80(t, *J* 8.4Hz, 1H), 7.67-7.63 (m, 2H) ,7.41-7.24 (m, 2H)

13C NMR (100 MHz CDCl3)**/**, ppm: 

MS(M+): 229.0886

Compound **4b:**

Yield: 85 % (Conversion: 70 %), m.p: 78-80 ºC

1H NMR (400 MHz CDCl3) /**, ppm: 9.18 (s, 1H), 8.75 (s, 1H), 8.32 (d, *J* 8.4 Hz, 1H), 7.98 (d, *J* 8 Hz,1H) ,7.78 (t, *J* 8Hz,1H) ,7.65(t, *J* 7.2 Hz,1H), 7.53 (d, *J* 8 Hz,2H) 7.20 (d, *J* 8 Hz, 2H), 2.39 (s, 3H)

13C NMR (100 MHz CDCl3)**/**, ppm: 

MS(M+): 243.1050

Compound **4c:**

Yield: 90 % (Conversion: 68 %), m.p: 93-96 ºC

1H NMR (400 MHz CDCl3) /**, ppm: 9.17 (s, 1H), 8.73 (s, 1H), 8.31 (d, *J* 8.4 Hz, 1H), 7.97 (d, *J* 8 .4 Hz, 1H), 7.78 (t, *J* 7.2 Hz, 1H), 7.64 (t, *J* 8 Hz,1H), 7.57 (d, *J* 4.8 Hz, 2H) 6.92 (d, *J* 8.8 Hz, 2H), 3.85 (s, 3H)

13C NMR (100 MHz CDCl3)**/**, ppm: 55.4183.1496.87114.05114.77116.29125.05127.72127.79128.55130.89, 133.11, 135.39, 145.99, 151.456, 159.841

MS(M+): 259.0996

Compound **4d**

Yield: 96 % (Conversion: 68 %), m.p: 125-126 ºC

1H NMR (400 MHz CDCl3) /**, ppm: 9.15 (s, 1H), 8.72 (s, 1H), 8.38 (d, *J* 8 Hz, 1H), 7.98 (d, *J* 8 Hz, 1H), 7.79 (t, *J* 8 Hz, 1H), 7.65 (t, *J* 8 Hz,1H),7.52 (d, *J* 6.8 Hz, 2H)

6.17 (d, *J* 6.8 Hz, 2H) 3.03 (s, 6H)

13C NMR (100 MHz CDCl3)**/**, ppm: 

MS(M+): 272.1306

Compound **4e:**

Yield: 85 % (Conversion: 70 %), m.p: 90-93 ºC

1H NMR (400 MHz CDCl3) /**, ppm: 9.12 (s, 1H), 8.70 (s, 1H), 8.33 (d, *J* 8.4 Hz,1H), 7.94 (d, *J* 8.4 Hz, 1H), 7.76 (t, *J* 8 Hz, 1H), 6.23 (t, *J* 8 Hz, 1H), 7.47 (d, *J* 8.8 Hz, 2H), 6.65 (d, *J* 7.2 Hz, 2H),3.39 (q, *J* 7.2 Hz, 4H), 1.19 (t, *J* 7.2Hz, 6H)

13C NMR (100 MHz CDCl3)**/**, ppm: 12.69, 44.47, 82.22,  98.59, 111.10, 116.95, 125.25, 127.56, 127.66, 130.63, 131.88, 131.98, 133.01, 135.36, 145.43, 147.66, 150.63

MS(M+): 300.1618

Compound **4f:**

Yield: 93 % (Conversion: 75 %), m.p: 109-110 ºC

1H NMR (400 MHz CDCl3) /**, ppm: 9.09 (s, 1H), 8.64 (s,1H), 8.26 (d, *J* 8.4 Hz, 1H), 7.89 (d, *J* 8 Hz, 1H), 7.71 (t, *J* 8 Hz, 1H), 7.57 (t, *J* 7.2 Hz, 1H), 7.45 (d, *J* 7.2 Hz, 2H) 6.85 (d, *J* 8Hz, 2H), 3.20 (t, *J* 8 Hz, 4H), 1.64 (m, 4H), 1.55 (m,2H )

13C NMR (100 MHz CDCl3)**/**, ppm: 24.4125.63 49.5182.63111.49115.08

125.15127.66127.76128.34128.43129.62130.2132.71133.95145.73151.15

151.64

MS(M+): 312.1617

Compound **5a:**

Yield: 90 % (Conversion 79 %) viscous liquid.

1H NMR (400 MHz CDCl3) /**, ppm: 8.48 (d, *J* 5.6 Hz, 1H), 8.44 (d, *J* 8.4 Hz, 1H), 7.77 (d, *J* 7.6 Hz, 1H), 7.62 (m, 4H), 7.56 (d, *J* 6 Hz, 1H), 7.34 (m, 3H)

13C NMR (100 MHz CDCl3)**/**, ppm: 144.12, 142.77, 135.66, 132.04, 130.46, 129.19, 129.16, 128.35, 127.85, 126.84 , 126.78, 122.06, 120.48, 93.90, 86.73

MS(M+): 229.08

Compound **5b:**

Yield: 86 % (Conversion 73%) m.p: 112-113 ºC

1H NMR (400 MHz CDCl3) /**, ppm: 8.55 (d, *J* 6 Hz, 1H), 8.51 (d, *J* 8 Hz, 1H), 7.84 (d, *J* 7.6 Hz, 1H), 7.70 (m, 2H), 7.62 (d, *J* 7.6 Hz, 3H), 7.22 (d, *J* 8.4Hz, 2H), 2.41 (s, 3H)

13C NMR (100 MHz CDCl3)**/**, ppm: 144.34, 142.77, 139.45, 135.67, 131.97, 130.41, 129.16, 129.13, 127.77, 126.92 , 126.75, 120.29, 119.00, 94.29, 86.27, 21.76

MS(M+): 243.10

Compound **5c:**

Yield: 85 % (Conversion 72 %) viscous liquid.

1H NMR (400 MHz CDCl3) /**, ppm: 8.54 (d, *J* 6Hz, 1H), 8.51 (d, *J* 8Hz, 1H), 7.84 (d, *J* 8Hz, 1H), 7.69 (m, 4H), 7.62 (d, *J* 7.6Hz, 1H), 6.94 (d, *J* 8.4Hz, 2H), 3.86 (s, 3H)

13C NMR (100 MHz CDCl3)**/**, ppm: 160.19, 144.46, 142.74, 135.66, 133.65, 130.39, 129.08, 127.72, 126.93, 126.74, 120.13, 114.11, 114.06, 94.34, 85.83, 55.40

MS(M+): 259.09

Compound **5d:**

Yield: 89 % (Conversion 73) m.p.: 105-107 ºC

1H NMR (400 MHz CDCl3) /**, ppm: 8.52 (d, *J* 6 Hz, 1H), 8.49 (d, *J* 8 Hz, 1H), 7.80 (d, *J* 7.6 Hz, 1H), 7.68 (m, 2H), 7.61 (d, *J* 6.8 Hz, 2H), 7.56 (d, *J* 5.6 Hz, 1H), 6.7 (d, *J* 8 Hz, 2H), 3.03 (s, 6H)

13C NMR (100 MHz CDCl3)**/**, ppm: 150.48, 144.97, 142.72, 135.64, 133.37, 130.24, 128.94, 127.49, 127.10, 126.64, 119.54, 111.57, 108.44, 96.23, 85.55, 40.19

MS(M+): 272.13

Compound **5e:**

Yield: 90 % (Conversion 73 %) m.p.: 89-93 ºC

1H NMR (400 MHz CDCl3) /**, ppm: 8.50 (d, *J* 8 Hz, 1H), 8.49 (d, *J* 6 Hz, 1H), 7.79 (d, *J* 7.6 Hz, 1H), 7.65 (m, 2H), 7.56 (d, *J* 8.4 Hz, 2H), 7.53 (d, *J* 5.6 Hz, 1H), 6.64 (d, *J* 8.8 Hz, 2H), 3.39 (q, *J* 7.2 Hz, 4H), 1.18 (t, *J* 7.2 Hz, 6H)

13C NMR (100 MHz CDCl3)**/**, ppm: 148.05, 145.10, 142.70, 135.66, 133.66, 130.22, 128.94, 127.45, 127.16, 126.63 , 119.42, 110.98, 107.35, 96.63, 85.40, 44.44, 12.69

MS(M+): 300.16

Compound **5f:**

Yield: 89 % (Conversion 70 %) m.p.: 162-165 ºC

1H NMR (400 MHz CDCl3) /**, ppm: 8.51 (d, *J* 5.2 Hz, 2H), 7.82 (d, *J* 7.6 Hz, 1H), 7.68 (m, 2H), 7.60 (d, *J* 9.2 Hz, 2H), 7.58 (d, *J* 6.4 Hz, 1H), 6.91(d, *J* 7.2 Hz, 2H), 3.29 (t, *J* 6 Hz, 4H), 1.69(m, 6H)

13C NMR (100 MHz CDCl3)**/**, ppm: 151.86, 144.85, 142.76, 135.67, 133.33, 130.29, 129.03, 127.57, 127.09, 126.68, 119.72, 114.84, 110.63, 95.69, 85.63, 49.31 , 25.60, 24.43

MS(M+): 312.10
